# Supplementary material
Source: PubMed Central journal article supplement (PMC6823621)
Supplement: ry190306suppa1.pdf [file ry190306suppa1.pdf]

**Table E1: MRI field strength at baseline and follow-up in the study cohort.**

|     | Tesla 1.5        | Tesla 3.0        |
|-----|------------------|------------------|
|     | Frequency, n (%) | Frequency, n (%) |
| MS  | 723 (53.9)       | 618 (46.1)       |
| CIS | 47 (37.9)        | 77 (62.1)        |
| HC  | 25 (17.0)        | 122 (83.0)       |

Legend: n–number; %–percentage; MS–multiple sclerosis; CIS–clinically isolated syndrome; HC–healthy controls.

**Table E2: Demographics, clinical and MRI characteristics of clinically definite multiple sclerosis converters versus nonconverters, among clinically isolated syndrome (n = 124) patients.**

| Demographic and clinical variables                                             | CDMS converters<br>(n = 35) | CDMS nonconverters<br>(n = 89) | P value        |
|--------------------------------------------------------------------------------|-----------------------------|--------------------------------|----------------|
| Women, n (%)                                                                   | 25 (71.4)                   | 85 (84.3)                      | <0.001*        |
| Age at first MRI in years, mean (SD)                                           | 37.8 (8.8)                  | 39.5 (11)                      | 0.09           |
| Disease duration over the follow-up, mean (SD)                                 | 3.5 (6.3)                   | 2.6 (3.6)                      | 0.045*         |
| Time over the follow-up in years, mean (SD)                                    | 4.9 (2.5)                   | 3.2 (2.2)                      | 0.001*         |
| Average n of MRIs per year over the follow-up, mean (SD)                       | 1.3 (0.9)                   | 1.6 (1.1)                      | 0.44           |
| Total n of MRIs over the follow-up, mean (SD)                                  | 4.7 (1.9)                   | 3.5 (1.7)                      | 0.47           |
| EDSS score at first MRI, median (IQR)                                          | 1.5 (1.0–1.7)               | 1.5 (1.0–2.0)                  | 0.38           |
| EDSS score change over the follow-up, mean (SD)                                | 0.5 (0.0–1.0)               | 0.0 (-0.5–0.4)                 | 0.038*         |
| <b>Lesion volume brain measures</b>                                            |                             |                                | <i>P value</i> |
| Baseline T2 lesion volume, mean (SD)                                           | 5,101.0 (3,880.3)           | 5,541.7 (6,171.4)              | 0.08           |
| Absolute change in T2 lesion volume over the follow-up, mean (SD)              | 710.1 (1,905.9)             | -47.8 (1,522.1)                | 0.12           |
| Annualized change in T2 lesion volume, mean (SD)                               | 88.3 (471.6)                | -81.7 (804.6)                  | 0.41           |
| Cumulative atrophied T2 lesion volume over the follow-up, mean (SD)            | 74.6 (135.6)                | 40.2 (83.6)                    | 0.09           |
| Annualized cumulative atrophied T2 lesion volume over the follow-up, mean (SD) | 15.2 (17.0)                 | 12.5 (15.0)                    | 0.10           |
| <b>Brain volume measures</b>                                                   |                             |                                |                |
| Baseline VV, mean (SD)                                                         | 33.2 (12.3)                 | 32.8 (13.6)                    | 0.50           |
| PVVC over the follow-up, mean (SD)                                             | 8.6 (11.6)                  | 6.5 (9.6)                      | 0.90           |
| Annualized PVVC over the follow-up, mean (SD)                                  | 2.3 (2.8)                   | 1.8 (7.1)                      | 0.18           |
| Baseline NBV, mean (SD)                                                        | 1,599.2 (798.3)             | 1,588.4 (777.6)                | 0.72           |
| PBVC over the follow-up, mean (SD)                                             | -2.4 (2.2)                  | -1.9 (2.2)                     | 0.41           |
| Annualized PBVC over the follow-up, mean (SD)                                  | -0.8 (0.9)                  | -0.5 (0.9)                     | 0.29           |

Legend: CDMS–clinically definite multiple sclerosis; n–number; SD–standard deviation; T2-LV–T2 lesion volume; VV–ventricular volume; PVVC–percentage ventricular volume change; NBV–normal brain volume; PBVC–percentage brain volume change.

All lesion measures are expressed in millimeter cubes, while the brain volume measures are expressed in centimeter cubes. *P* values represent CDMS converters versus CDMS nonconverters groups comparisons and were derived using chi-squared test, Student *t* test and Mann-Whitney *U* test, as appropriated. For MRI measurements, all *P* values were corrected for age and time to follow-up; between groups *P* values were derived from ANCOVA analysis.

\* Significant *P* values are indicated with \*.
